# Supplementary material for: Dysregulation of miR-15a-5p, miR-497a-5p and miR-511-5p Is Associated with Modulation of BDNF and FKBP5 in Brain Areas of PTSD-Related Susceptible and Resilient Mice
Source: Int J Mol Sci. 2021 May 13;22(10):5157. doi: 10.3390/ijms22105157 (PMC8153003; doi:10.3390/ijms22105157)

ASR = acoustic startle reactivity  
OF = Open Field  
EPM = Elevated Place Maze  
5-trial SM = 5 – trial Social Memory Test

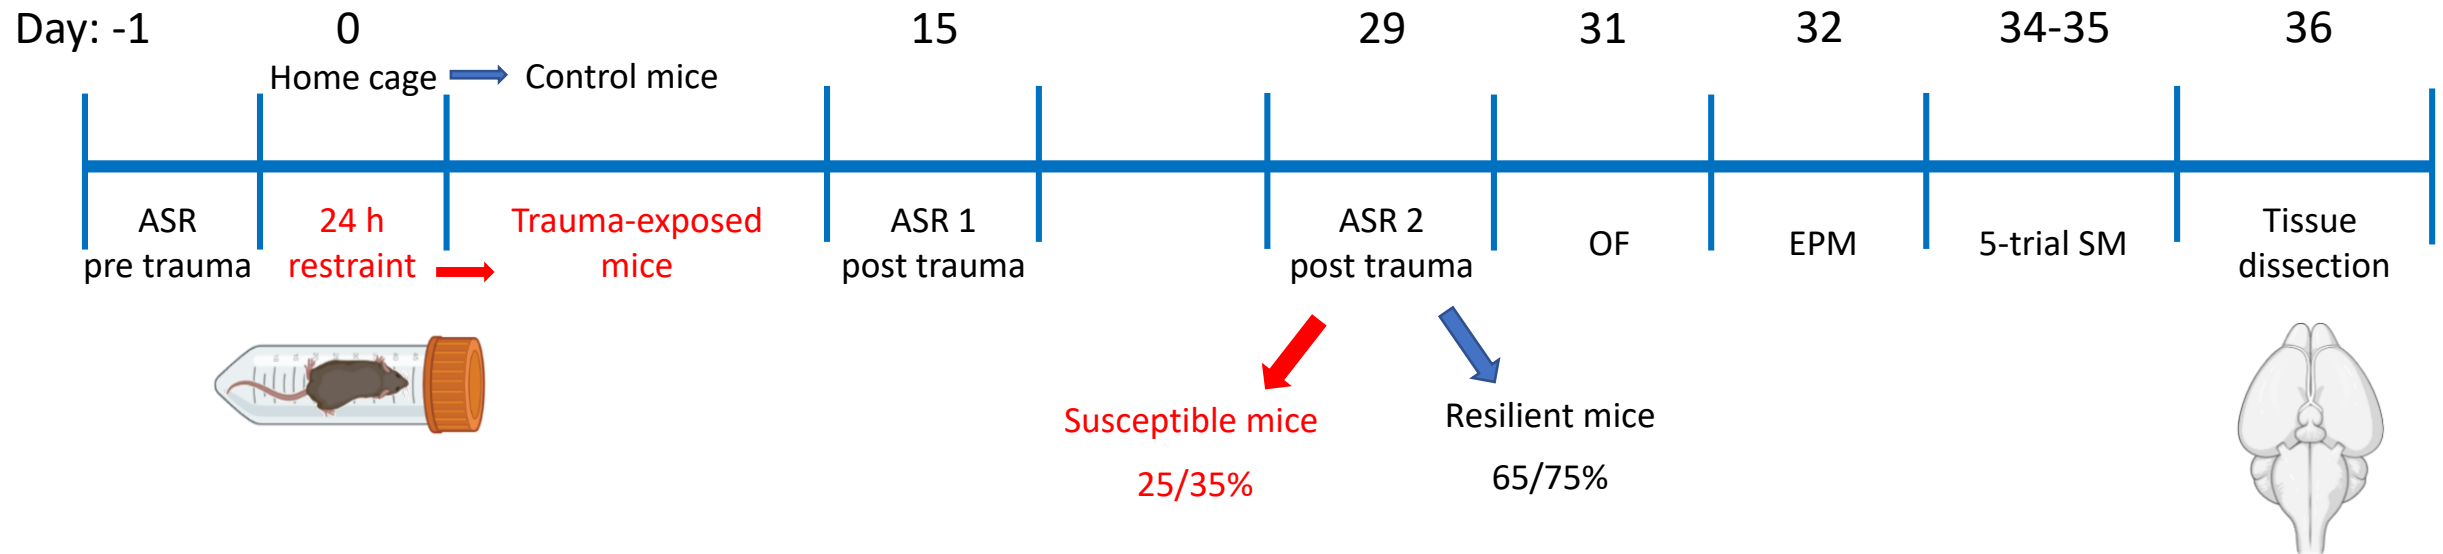

Supplement: Supplementary file 1 [file ijms-22-05157-s001.zip › ijms-1208533-supplementary.pdf]
